# Supplementary material for: Effects of manipulating slowpoke calcium-dependent potassium channel expression on rhythmic locomotor activity in Drosophila larvae
Source: PeerJ journal article supplement (doi:10.7717/peerj.57), 2013-03-26
Supplement: McKiernan_SloMS_Supplemental1.pdf [file McKiernan_SloMS_Supplemental1.pdf]

## Supplemental Information 1: Effects of dissection method on locomotor activity in *Drosophila* larvae

Erin C. McKiernan<sup>1\*</sup>

<sup>1</sup>Instituto Tecnológico y de Estudios Superiores de Monterrey, Xochitepec, Morelos, México

\*Correspondence: emck31@gmail.com

### Dissection method alters timing of rhythmic motor activity

Intracellular recordings were made from muscles 1 or 2 (M1, M2) in dorsal-midline (DM) and off-midline (OM) dissected larvae, as schematized in Fig. 1. Rhythmic activity was recorded in all 20 DM-dissected larvae (100%) and in 25 of 27 OM-dissected larvae (93%). Both anterior (A) to posterior (P) and P to A waves were observed in each group, with the latter the more prevalent type of activity. In the DM group, 4 of 20 larvae (20%) displayed A to P waves, while all 20 larvae (100%) displayed P to A waves. Similarly, A to P waves were recorded in 5 of 25 active OM larvae (20%), while P to A waves were recorded in all 25 (100%).

Of the 23 total bouts of activity recorded in DM larvae, 3 (13%) consisted of exclusively A to P waves, 18 (78%) of only P to A waves, and 2 (8%) were combination bouts comprised of both types of activity. In OM larvae, a total of 24 bouts were recorded, 20 (83%) of which were comprised of P to A waves, and 4 (17%) of which were combination bouts including both wave types. In the OM group no bouts of exclusively A to P waves were recorded. In both groups, individual P to A wave bouts ranged from 1 to 9 minutes. Combination bouts lasted 2 minutes in DM larvae, and 4-9 minutes in OM larvae. In

sum, preparing larvae using the new OM dissection did not affect the incidence or duration of rhythmic activity, relative to larvae prepared using the DM dissection ( $p > 0.05$ ).

Rhythmic activity was quantified in 18 out of 20 active DM larvae, and in 21 of 25 active OM larvae. Fig. 1C shows representative recordings of P to A wave bouts in DM (top trace) and OM (bottom trace) larvae, and reveals that the motor pattern was noticeably faster in OM larvae. Histograms of burst duration, cycle duration, duty cycle, and quiescence interval are shown for comparison in Fig. 2. Minimum, maximum, and quartile values for each measure from DM and OM recordings are summarized for comparison in Table 1. Taking the difference between the quartiles for each group revealed that burst durations were 4.99-6.36 s shorter in OM versus DM larvae, representing a 43-44% decrease. Cycle durations were also shorter in OM larvae by 3.95-5.35s (27-29% decrease). Bursting in OM larvae comprised less of each cycle than in DM larvae, resulting in duty cycles that were smaller by 0.15-0.17 (18-23% decrease) and quiescence intervals that were larger by 1.02-1.23s (20-29% increase). In sum, the motor pattern recorded from OM larvae was quantifiably distinct from that of DM larvae on all measures ( $p < 0.001$ ).

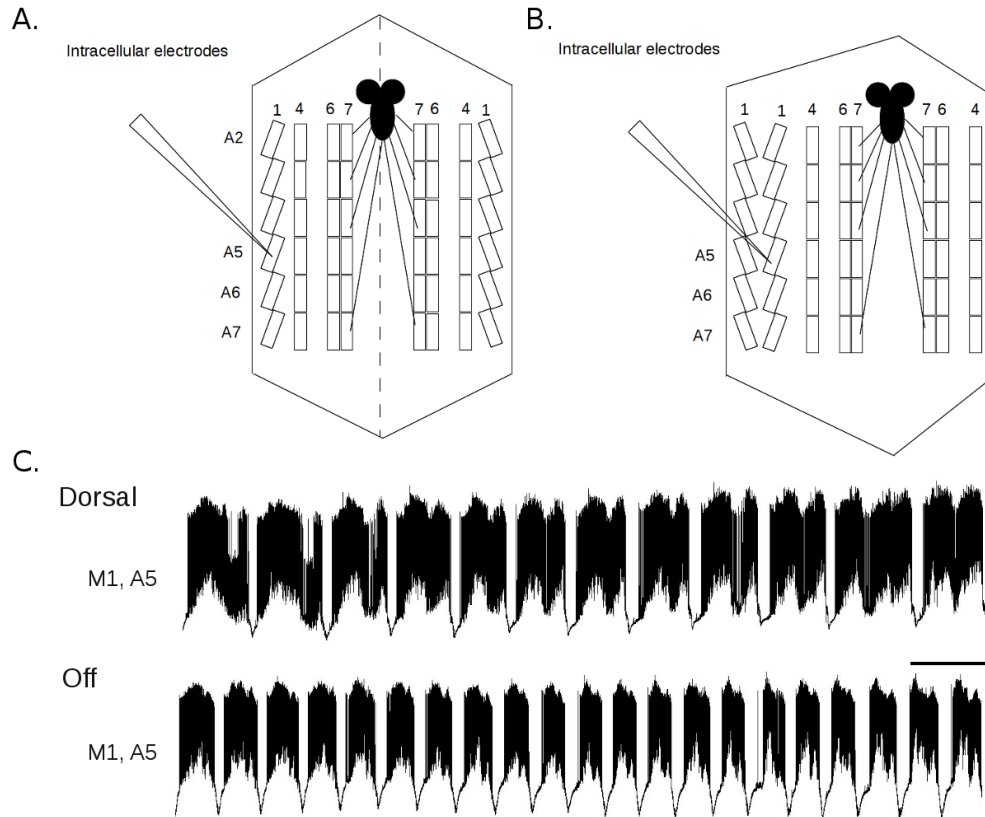

**Figure 1: Intracellular recordings of rhythmic motor activity in dorsal- and off-midline dissected WT larvae.** Schematics of dorsal (A) and off (B) midline preparations. Cuts (dashed lines) were made up the midline, or to right of the midline, as indicated. Larvae were pinned and cleaned so muscles (rectangles) and central nervous system (solid black) were exposed. Muscles 1,2,4,6,7 and abdominal segments A5-A7 are labeled. The hemisegmental nerves exit the ventral nerve cord and innervate muscles in each segment. For clarity, not all muscles, segments, or nerves are pictured. C: Recordings from M1 in A5 during P to A waves in dorsal (top trace) and off (bottom trace) midline dissected larvae. Scale bar 20 seconds.

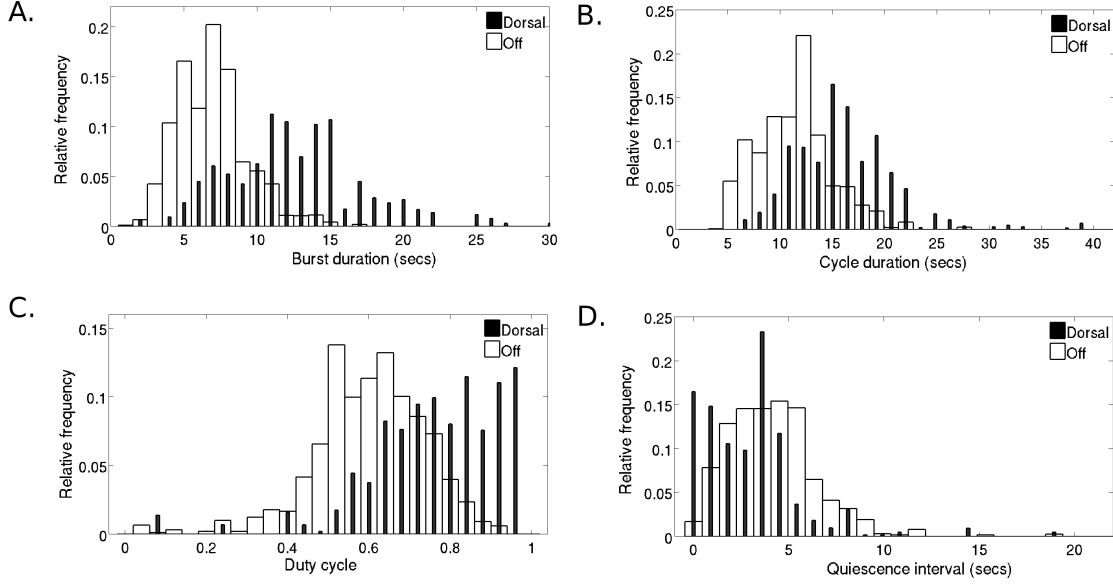

**Figure 2: Quantification of motor activity in dorsal- and off-midline dissected larvae.** Histograms of burst durations (A.), cycle durations (B.), duty cycles (C.), and quiescence intervals (D.) for dorsal (black) and off (white) midline dissected larvae.

**Table 1: Measures of motor pattern in dorsal- and off-midline dissected larvae**

| dissection | measure             | n  | min(s) | max(s) | Q1(s) | Q2(s) | Q3(s) | p-value <sup>a</sup> |
|------------|---------------------|----|--------|--------|-------|-------|-------|----------------------|
| <b>DM</b>  |                     |    |        |        |       |       |       |                      |
|            | burst duration      | 18 | 2.90   | 34.10  | 11.31 | 12.94 | 14.80 | -                    |
|            | cycle duration      | 18 | 7.27   | ≥60    | 14.61 | 16.22 | 18.28 | -                    |
|            | duty cycle          | 18 | 0.10   | 0.99   | 0.74  | 0.80  | 0.84  | -                    |
|            | quiescence interval | 18 | 0.12   | ≥60    | 2.57  | 3.12  | 4.16  | -                    |
| <b>OM</b>  |                     |    |        |        |       |       |       |                      |
|            | burst duration      | 21 | 1.61   | 17.21  | 6.32  | 7.19  | 8.44  | <0.0001              |
|            | cycle duration      | 21 | 5.19   | ≥60    | 10.66 | 11.81 | 12.93 | <0.0001              |
|            | duty cycle          | 21 | 0.05   | 0.93   | 0.57  | 0.63  | 0.69  | <0.0001              |
|            | quiescence interval | 21 | 0.59   | ≥60    | 3.63  | 4.35  | 5.18  | <0.0001              |

<sup>a</sup>Mann-Whitney U Test/Wilcoxon rank-sum test, compared to DM
